# Supplementary material for: Concealing Untrustworthiness: The Role of Conflict Monitoring in a Social Deception Task
Source: Frontiers journal article supplement (doi:10.3389/fpsyg.2021.718334), 2021-08-20
Supplement: Data_Sheet_1.pdf [file Data_Sheet_1.pdf]

(A)

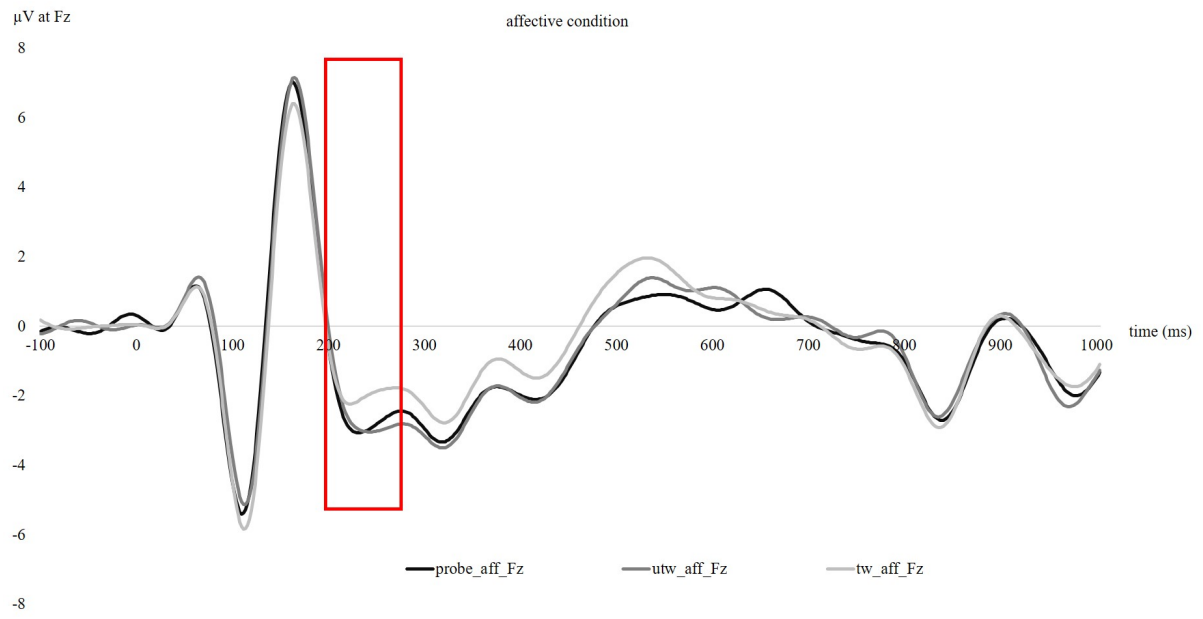

(B)

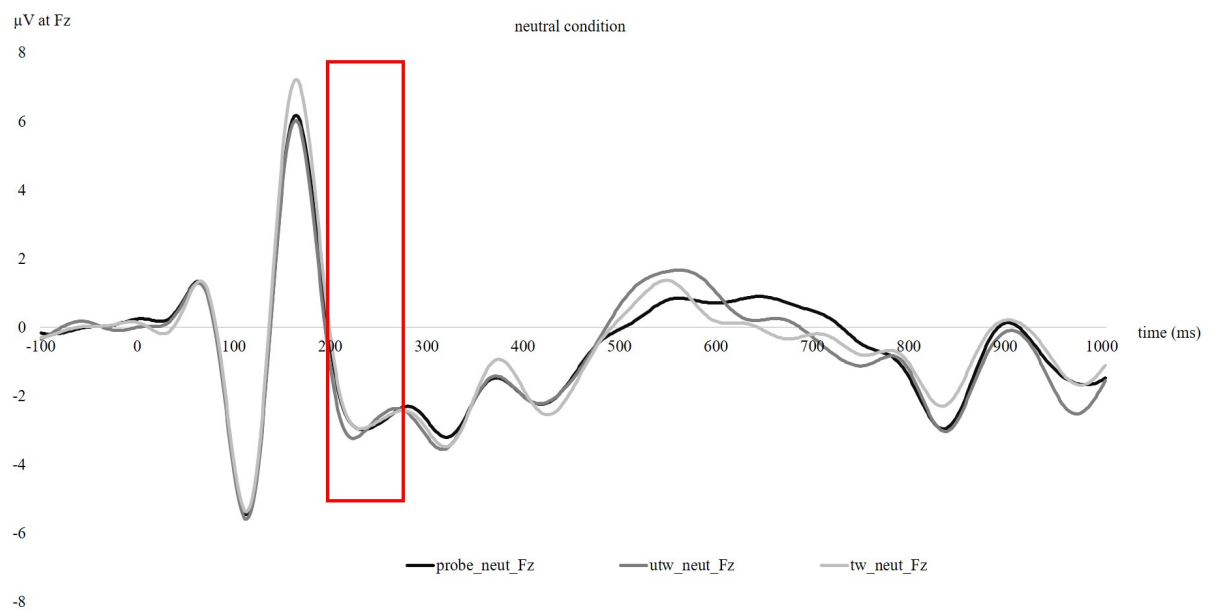

**Figure S1.** Stimulus-locked grand averages at Fz from 0 to 1000 ms post-stimulus, with a 100 ms pre-stimulus baseline for three picture types (untrustworthy-probe, truthful untrustworthy, truthful trustworthy) in the affective condition (A) and neutral condition (B). Stimulus was presented from 0 to 700 ms. N2 amplitudes were identified between 200 and 275 ms post-stimulus.

(A)

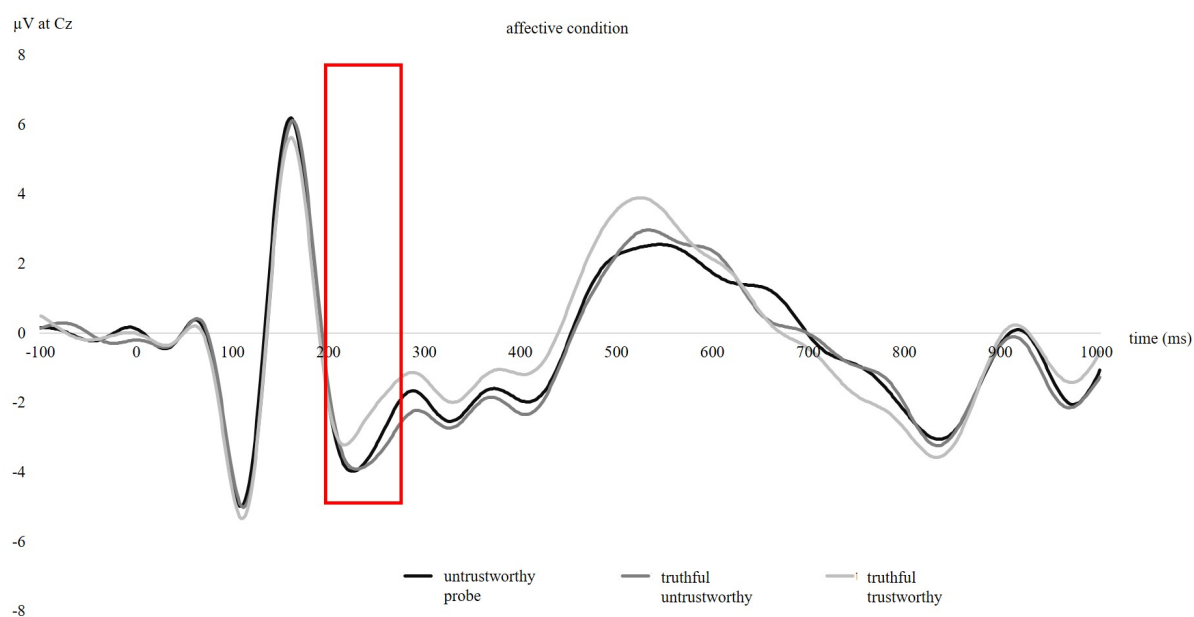

(B)

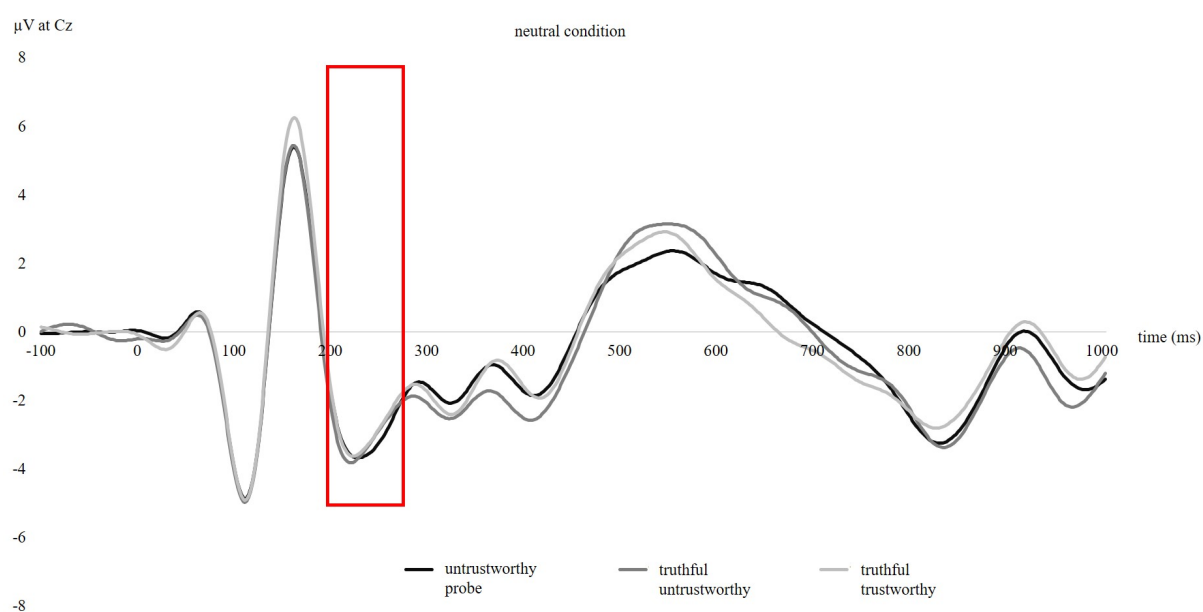

**Figure S2.** Stimulus-locked grand averages at Cz from 0 to 1000 ms post-stimulus, with a 100 ms pre-stimulus baseline for three picture types (untrustworthy-probe, truthful untrustworthy, truthful trustworthy) in the affective condition (A) and neutral condition (B). Stimulus was presented from 0 to 700 ms. N2 amplitudes were identified between 200 and 275 ms post-stimulus.

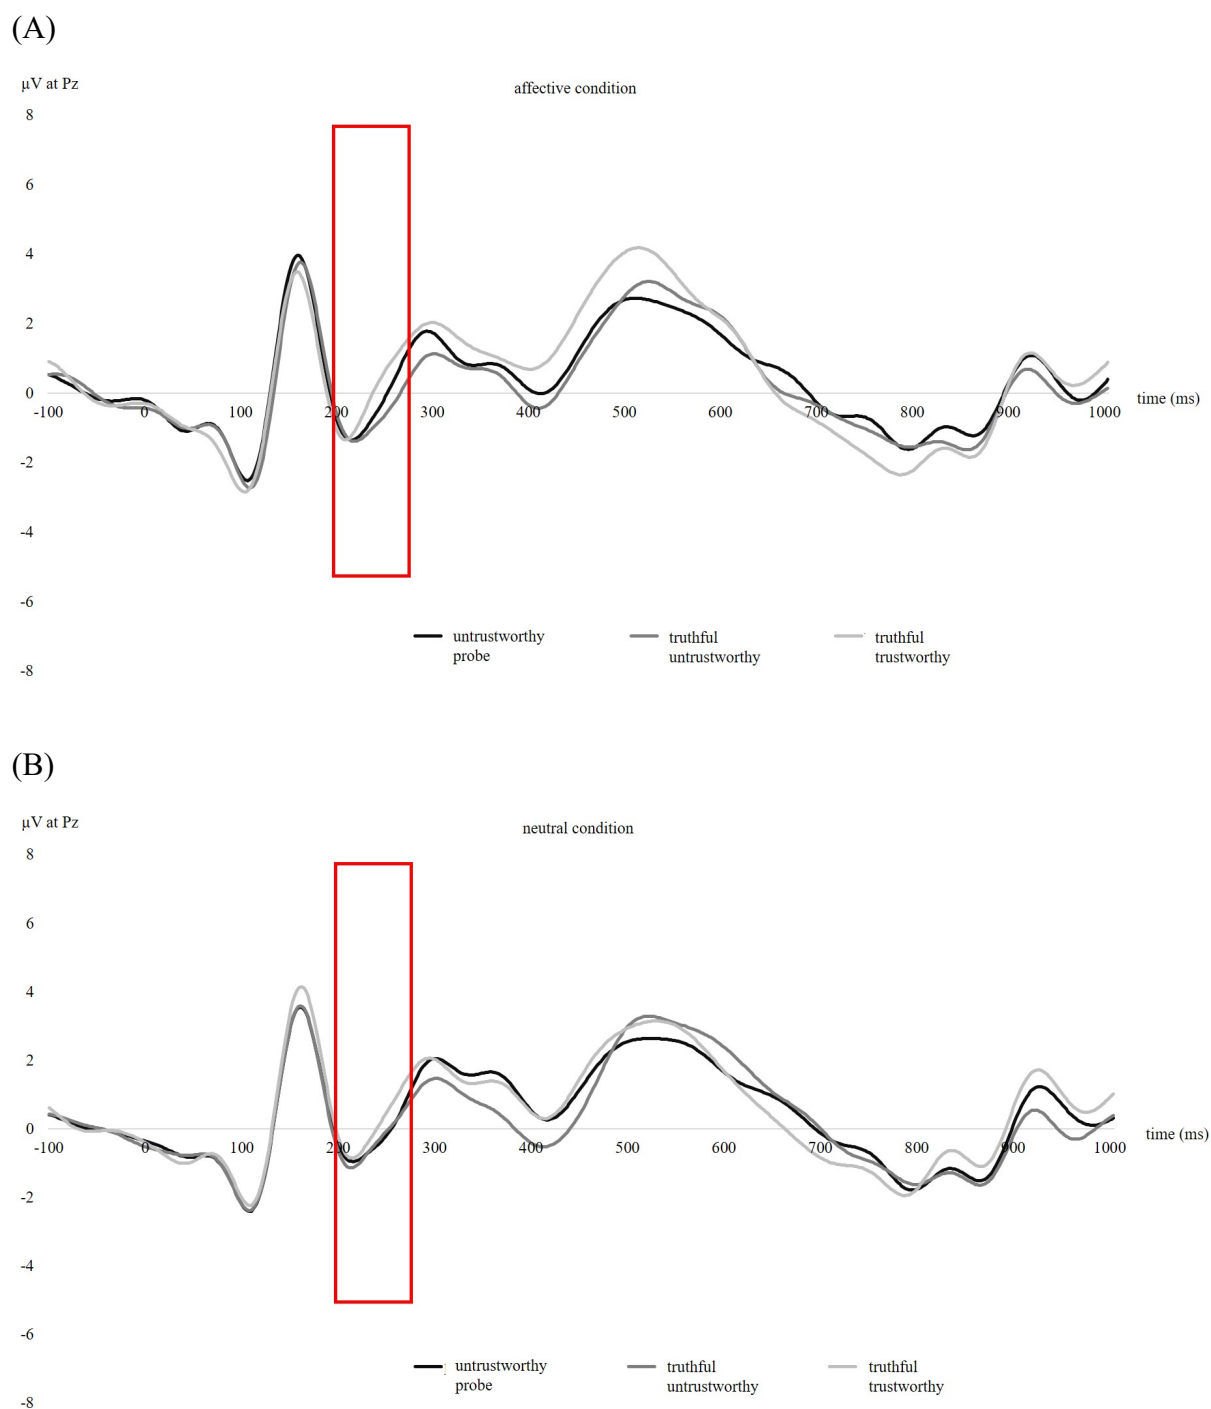

**Figure S3.** Stimulus-locked grand averages at Pz from 0 to 1000 ms post-stimulus, with a 100 ms pre-stimulus baseline for three picture types (untrustworthy-probe, truthful untrustworthy, truthful trustworthy) in the affective condition (A) and neutral condition (B). Stimulus was presented from 0 to 700 ms. N2 amplitudes were identified between 200 and 275 ms post-stimulus.

**Table S1.** N2 amplitudes in microvolt ( $\mu\text{V}$ ) for Electrode position, Picture type, Condition, Task sequence and Gender of the participant based on different quantifications.

|                                             | Mean amplitude      | Baseline-to-Peak<br>amplitude | Peak-to-Peak<br>amplitude N2-P2 |
|---------------------------------------------|---------------------|-------------------------------|---------------------------------|
| Electrode position <sup>1,2,3,4</sup>       | *                   | *                             | *                               |
| Fz                                          | -2.43 (3.56) [0.65] | -4.71 (3.86) [0.70]           | -12.57 (6.58) [1.20]            |
| FCz                                         | -3.00 (3.43) [0.63] | -5.27 (3.69) [0.67]           | -13.08 (6.94) [1.27]            |
| Cz                                          | -2.95 (3.35) [0.61] | -5.31 (3.55) [0.65]           | -12.40 (7.18) [1.32]            |
| Pz                                          | -0.26 (3.83) [0.70] | -2.58 (3.59) [0.66]           | -7.50 (5.74) [1.05]             |
| Picture type <sup>2,3,4,5</sup>             | *                   | *                             |                                 |
| Probe                                       | -3.13 (3.38) [0.62] | -5.45 (3.65) [0.67]           | -13.19 (7.07) [1.29]            |
| Utw                                         | -3.25 (3.72) [0.68] | -5.42 (4.07) [0.74]           | -13.18 (7.14) [1.30]            |
| Tw                                          | -2.64 (3.44) [0.63] | -4.95 (3.60) [0.66]           | -12.87 (6.76) [1.23]            |
| Condition <sup>1,3,4,5</sup>                |                     |                               |                                 |
| Affective                                   | -2.95 (3.48) [0.64] | -5.18 (3.68) [0.67]           | -13.12 (7.21) [1.32]            |
| Neutral                                     | -3.05 (3.52) [0.64] | -5.37 (3.82) [0.70]           | -13.04 (6.80) [1.24]            |
| Task sequence <sup>1,2,4,5</sup>            |                     |                               |                                 |
| Affective-neutral                           | -2.78 (3.98) [1.03] | -5.12 (4.02) [1.04]           | -14.52 (7.15) [1.85]            |
| Neutral-affective                           | -3.23 (2.90) [0.75] | -5.43 (3.46) [0.89]           | -11.65 (6.66) [1.72]            |
| Gender of<br>participant <sup>1,2,3,5</sup> |                     |                               |                                 |
| Male                                        | -3.00 (4.01) [1.04] | -5.23 (4.51) [1.16]           | -13.55 (8.57) [2.21]            |
| Female                                      | -3.01 (2.87) [0.74] | -5.32 (2.81) [0.72]           | -12.61 (5.10) [1.32]            |

*Note.* Scores are presented in mean (standard deviation, SD) [standard error of the mean, SEM]. \* Significant at  $\alpha = .05$ . <sup>1</sup> Amplitudes are averaged over picture types. <sup>2</sup> Amplitudes are averaged over conditions (affective vs. neutral). <sup>3</sup> Amplitudes are averaged over task sequence (affective-neutral vs. neutral-affective). <sup>4</sup> Amplitudes are averaged over gender of the participant. <sup>5</sup> Amplitudes are measured at FCz. Probe = Untrustworthy-probe. Utw = Truthful untrustworthy. Tw = Truthful trustworthy.

**Table S2.** N2 amplitudes in microvolt ( $\mu\text{V}$ ) measured at FCz for interactions of Picture type, Condition, Task sequence and Gender of the participant based on different quantifications.

|                                                       | Mean amplitude      | Baseline-to-Peak<br>amplitude | Peak-to-Peak<br>amplitude N2-P2 |
|-------------------------------------------------------|---------------------|-------------------------------|---------------------------------|
| Picture type $\times$<br>Condition <sup>1,2</sup>     |                     |                               | *                               |
| Probe aff.                                            | -3.17 (3.66) [0.67] | -5.40 (3.91) [0.71]           | -13.53 (7.70) [1.41]            |
| Utw aff.                                              | -3.34 (3.84) [0.70] | -5.38 (4.13) [0.75]           | -13.54 (7.61) [1.39]            |
| Tw aff.                                               | -2.35 (3.44) [0.63] | -4.76 (3.60) [0.66]           | -12.29 (6.67) [1.22]            |
| Probe neut.                                           | -3.09 (3.47) [0.63] | -5.51 (3.71) [0.68]           | -12.85 (6.77) [1.24]            |
| Utw neut.                                             | -3.15 (3.83) [0.70] | -5.46 (4.32) [0.79]           | -12.83 (6.94) [1.27]            |
| Tw neut.                                              | -2.92 (3.67) [0.67] | -5.15 (3.86) [0.71]           | -13.45 (6.97) [1.27]            |
| Picture type $\times$ Task<br>sequence <sup>2,3</sup> |                     | +                             |                                 |
| Probe aff.-neut.                                      | -3.14 (3.75) [0.97] | -5.62 (3.79) [0.98]           | -14.62 (7.27) [1.88]            |
| Utw aff.-neut.                                        | -2.95 (4.38) [1.13] | -5.26 (4.58) [1.18]           | -14.77 (7.32) [1.89]            |
| Tw aff.-neut.                                         | -2.24 (3.99) [1.03] | -4.49 (3.95) [1.02]           | -14.57 (7.29) [1.87]            |
| Probe neut.-aff.                                      | -3.12 (3.09) [0.80] | -5.29 (3.63) [0.94]           | -11.76 (6.81) [1.76]            |
| Utw neut.-aff.                                        | -3.54 (3.06) [0.79] | -5.58 (3.65) [0.94]           | -11.60 (6.83) [1.76]            |
| Tw neut.-aff.                                         | -3.04 (2.87) [0.74] | -5.41 (3.29) [0.85]           | -11.58 (6.82) [1.76]            |
| Picture type $\times$ Gender <sup>1,3</sup>           |                     |                               |                                 |
| Probe male                                            | -2.98 (3.78) [0.98] | -5.30 (4.27) [1.10]           | -13.69 (8.73) [2.25]            |
| Utw male                                              | -3.32 (4.59) [1.18] | -5.47 (5.14) [1.33]           | -13.87 (8.97) [2.31]            |
| Tw male                                               | -2.70 (3.85) [0.99] | -4.93 (4.26) [1.10]           | -13.87 (8.97) [2.31]            |
| Probe female                                          | -3.28 (3.04) [0.79] | -5.61 (3.05) [0.79]           | -12.69 (5.18) [1.34]            |
| Utw female                                            | -3.17 (2.77) [0.71] | -5.37 (2.82) [0.73]           | -12.49 (4.92) [1.27]            |
| Tw female                                             | -2.58 (3.11) [0.80] | -4.97 (2.95) [0.76]           | -12.45 (4.90) [1.27]            |
| Condition $\times$ Task<br>sequence <sup>2,4</sup>    |                     |                               |                                 |
| Aff. aff.-neut.                                       | -2.77 (4.12) [1.06] | -5.07 (4.03) [1.04]           | -14.73 (7.56) [1.95]            |
| Neut. aff.-neut.                                      | -2.78 (3.96) [1.02] | -5.17 (4.13) [1.07]           | -14.30 (6.87) [1.77]            |
| Aff. neut.-aff.                                       | -3.14 (2.84) [0.73] | -5.29 (3.42) [0.88]           | -11.51 (6.71) [1.73]            |
| Neut. neut.-aff.                                      | -3.33 (3.13) [0.81] | -5.57 (3.62) [0.93]           | -11.78 (6.72) [1.73]            |
| Condition $\times$ Gender <sup>1,4</sup>              |                     |                               |                                 |
| Aff. male                                             | -3.00 (4.03) [1.04] | -5.22 (4.46) [1.15]           | -13.62 (8.93) [2.31]            |
| Neut. male                                            | -3.00 (4.12) [1.06] | -5.25 (4.66) [1.20]           | -13.48 (8.32) [2.15]            |
| Aff. female                                           | -2.91 (2.98) [0.77] | -5.14 (2.85) [0.74]           | -12.62 (5.24) [1.35]            |
| Neut. female                                          | -3.11 (2.95) [0.76] | -5.49 (2.91) [0.75]           | -12.61 (5.11) [1.32]            |
| Task sequence $\times$<br>Gender <sup>3,4</sup>       |                     |                               |                                 |
| Aff.-neut. male                                       | -2.46 (4.88) [1.73] | -4.40 (5.06) [1.79]           | -14.43 (9.18) [3.24]            |
| Neut.-aff. male                                       | -3.62 (2.99) [1.13] | -6.19 (3.95) [1.49]           | -12.54 (8.41) [3.18]            |
| Aff.-neut. female                                     | -3.14 (2.97) [1.12] | -5.95 (2.53) [0.96]           | -14.61 (4.59) [1.73]            |
| Neut.-aff. female                                     | -2.89 (2.99) [1.06] | -4.76 (3.09) [1.09]           | -10.87 (5.15) [1.82]            |

*Note.* Scores are presented in mean (standard deviation, SD) [standard error of the mean, SEM]. \* Significant at  $\alpha = .05$ . + marginally significant at  $\alpha = .10$ . <sup>1</sup> Amplitudes are averaged over task sequence (affective-neutral vs. neutral-affective). <sup>2</sup> Amplitudes are averaged over gender. <sup>3</sup> Amplitudes are averaged over conditions (affective vs. neutral). <sup>4</sup> Amplitudes are averaged over picture types. Probe = Untrustworthy-probe. Utw = Truthful untrustworthy. Tw = Truthful trustworthy. Aff. = affective. Neut. = neutral.

**Table S3A.** N2 amplitudes in microvolt ( $\mu\text{V}$ ) measured at FCz for higher-order interactions of Picture type, Condition, Task sequence and Gender of the participant based on different quantifications.

|                                                                           | Mean amplitude      | Baseline-to-Peak<br>amplitude | Peak-to-Peak<br>amplitude N2-P2 |
|---------------------------------------------------------------------------|---------------------|-------------------------------|---------------------------------|
| Picture type $\times$<br>Condition $\times$ Task<br>sequence <sup>1</sup> |                     |                               |                                 |
| Probe aff. aff.-neut.                                                     | -3.48 (4.09) [1.06] | -5.86 (4.01) [1.03]           | -15.27 (8.01) [2.07]            |
| Utw aff. aff.-neut.                                                       | -3.03 (4.56) [1.18] | -5.38 (4.73) [1.22]           | -15.63 (7.99) [2.06]            |
| Tw aff. aff.-neut.                                                        | -1.81 (4.08) [1.05] | -3.98 (3.86) [1.00]           | -13.29 (7.15) [1.85]            |
| Probe neut. aff.-neut.                                                    | -2.80 (3.84) [0.99] | -5.38 (3.87) [1.00]           | -13.97 (6.91) [1.78]            |
| Utw neut. aff.-neut.                                                      | -2.87 (4.42) [1.14] | -5.14 (4.68) [1.21]           | -13.90 (6.86) [1.77]            |
| Tw neut. aff.-neut.                                                       | -2.67 (4.06) [1.05] | -5.00 (4.27) [1.10]           | -15.03 (7.13) [1.84]            |
| Probe aff. neut.-aff.                                                     | -2.86 (3.29) [0.85] | -4.95 (3.89) [1.00]           | -11.79 (7.23) [1.87]            |
| Utw aff. neut.-aff.                                                       | -3.66 (3.08) [0.80] | -5.37 (3.61) [0.93]           | -11.45 (6.85) [1.77]            |
| Tw aff. neut.-aff.                                                        | -2.89 (2.68) [0.69] | -5.54 (3.27) [0.85]           | -11.29 (6.25) [1.61]            |
| Probe neut. neut.-aff.                                                    | -3.38 (3.16) [0.82] | -5.63 (3.67) [0.95]           | -11.73 (6.67) [1.72]            |
| Utw neut. neut.-aff.                                                      | -3.42 (3.27) [0.84] | -5.78 (4.06) [1.05]           | -11.75 (7.09) [1.83]            |
| Tw neut. neut.-aff.                                                       | -3.18 (3.36) [0.87] | -5.29 (3.56) [0.92]           | -11.87 (6.66) [1.72]            |
| Picture type $\times$<br>Condition $\times$ Gender <sup>2</sup>           |                     |                               |                                 |
| Probe aff. male                                                           | -3.09 (4.24) [1.09] | -5.30 (4.72) [1.22]           | -14.03 (9.47) [2.45]            |
| Utw aff. male                                                             | -3.49 (4.67) [1.21] | -5.48 (5.26) [1.36]           | -14.12 (9.81) [2.53]            |
| Tw aff. male                                                              | -2.41 (3.61) [0.93] | -4.86 (3.96) [1.02]           | -12.71 (7.84) [2.02]            |
| Probe neut. male                                                          | -2.86 (3.83) [0.99] | -5.29 (4.27) [1.10]           | -13.34 (8.34) [2.15]            |
| Utw neut. male                                                            | -3.15 (4.69) [1.21] | -5.46 (5.39) [1.39]           | -13.63 (8.36) [2.16]            |
| Tw neut. male                                                             | -2.99 (4.23) [1.09] | -5.00 (4.72) [1.22]           | -13.47 (8.42) [2.17]            |
| Probe aff. female                                                         | -3.25 (3.13) [0.81] | -5.50 (3.05) [0.79]           | -13.02 (5.71) [1.47]            |
| Utw aff. female                                                           | -3.20 (2.94) [0.76] | -5.27 (2.78) [0.72]           | -12.96 (4.80) [1.24]            |
| Tw aff. female                                                            | -2.30 (3.38) [0.87] | -4.65 (3.34) [0.86]           | -11.87 (5.52) [1.42]            |
| Probe neut. female                                                        | -3.32 (3.18) [0.82] | -5.72 (3.18) [0.82]           | -12.36 (4.99) [1.29]            |
| Utw neut. female                                                          | -3.14 (2.90) [0.75] | -5.46 (3.09) [0.80]           | -12.03 (5.34) [1.38]            |
| Tw neut. female                                                           | -2.86 (3.16) [0.82] | -5.29 (2.93) [0.76]           | -13.43 (5.45) [1.41]            |
| Condition $\times$ Task<br>sequence $\times$ Gender <sup>3</sup>          |                     |                               |                                 |
| *                                                                         |                     |                               |                                 |
| Aff. aff.-neut. male                                                      | -2.76 (4.95) [1.75] | -4.64 (5.00) [1.77]           | -14.85 (9.52) [3.37]            |
| Neut. aff.-neut. male                                                     | -2.16 (4.88) [1.73] | -4.15 (5.17) [1.83]           | -14.01 (8.91) [3.15]            |
| Aff. neut.-aff. male                                                      | -3.27 (3.02) [1.14] | -5.87 (4.03) [1.52]           | -12.21 (8.71) [3.29]            |
| Neut. neut.-aff. male                                                     | -3.97 (3.12) [1.18] | -6.51 (4.01) [1.52]           | -12.87 (8.25) [3.12]            |
| Aff. aff.-neut. female                                                    | -2.79 (3.33) [1.26] | -5.56 (2.87) [1.09]           | -14.59 (5.24) [1.98]            |
| Neut. aff.-neut. female                                                   | -3.49 (2.77) [1.05] | -5.34 (2.37) [0.89]           | -14.63 (4.15) [1.57]            |
| Aff. neut.-aff. female                                                    | -3.02 (2.87) [1.01] | -4.78 (1.98) [1.05]           | -10.90 (4.91) [1.73]            |
| Neut. neut.-aff. female                                                   | -2.77 (3.25) [1.15] | -4.75 (3.28) [1.16]           | -10.83 (5.45) [1.93]            |

*Note.* Scores are presented in mean (standard deviation, SD) [standard error of the mean, SEM]. \* Significant at  $\alpha = .05$ . <sup>1</sup> Amplitudes are averaged over gender. <sup>2</sup> Amplitudes are averaged over task sequence (affective-neutral vs. neutral-affective). <sup>3</sup> Amplitudes are averaged picture types. Probe = Untrustworthy-probe. Utw = Truthful untrustworthy. Tw = Truthful trustworthy. Aff. = affective. Neut. = neutral. For statistical results and additional significant higher-order interactions revealed by post-hoc explorations, see Table S4.

**Table S3B.** N2 amplitudes in microvolt ( $\mu\text{V}$ ) measured at FCz for higher-order interactions of Picture type, Condition, Task sequence and Gender of the participant based on different quantifications.

|                                                                           | Mean amplitude      | Baseline-to-Peak<br>amplitude | Peak-to-Peak<br>amplitude N2-P2 |
|---------------------------------------------------------------------------|---------------------|-------------------------------|---------------------------------|
| Picture type $\times$ Task<br>sequence $\times$ Gender <sup>1</sup>       |                     |                               |                                 |
| Probe. aff.-neut. male                                                    | -2.68 (4.36) [1.54] | -4.76 (4.49) [1.59]           | -14.62 (9.18) [3.35]            |
| Utw. aff.-neut. male                                                      | -2.59 (5.65) [2.00] | -4.48 (5.98) [2.11]           | -14.85 (9.77) [3.46]            |
| Tw aff.-neut. male                                                        | -2.11 (4.69) [1.66] | -3.95 (4.76) [1.68]           | -14.64 (9.75) [3.45]            |
| Probe neut.-aff. male                                                     | -3.32 (3.30) [1.25] | -5.92 (4.27) [1.61]           | -12.62 (8.78) [3.32]            |
| Utw. neut.-aff. male                                                      | -4.16 (3.22) [1.22] | -6.60 (4.14) [1.57]           | -12.75 (8.56) [3.24]            |
| Tw neut.-aff. male                                                        | -3.38 (2.81) [1.06] | -6.05 (3.64) [1.38]           | -12.69 (8.54) [3.22]            |
| Probe aff.-neut. female                                                   | -3.67 (3.17) [1.20] | -6.60 (2.81) [1.06]           | -14.61 (5.00) [1.89]            |
| Utw. aff.-neut. female                                                    | -3.36 (2.68) [1.01] | -6.15 (2.36) [0.89]           | -14.67 (3.66) [1.38]            |
| Tw. aff.-neut. female                                                     | -2.39 (3.39) [1.28] | -5.10 (3.03) [1.15]           | -14.66 (3.64) [1.37]            |
| Probe neut.-aff. female                                                   | -2.95 (3.10) [1.10] | -4.74 (3.16) [1.12]           | -11.01 (5.02) [1.78]            |
| Utw neut.-aff. female                                                     | -3.00 (3.01) [1.06] | -4.68 (3.17) [1.12]           | -10.59 (5.29) [1.87]            |
| Tw neut.-aff. female                                                      | -2.74 (3.07) [1.09] | -4.86 (3.09) [1.09]           | -10.64 (5.31) [1.88]            |
| Picture type $\times$ Condition $\times$<br>Task sequence $\times$ Gender |                     |                               |                                 |
| Probe aff. aff.-neut. male                                                | -3.23 (4.83) [1.71] | -5.22 (4.81) [1.70]           | -15.46 (9.99) [3.53]            |
| Utw aff. aff.-neut. male                                                  | -3.02 (5.78) [2.04] | -4.91 (6.24) [2.20]           | -15.80 (10.64) [3.76]           |
| Tw aff. aff.-neut. male                                                   | -2.03 (4.60) [1.63] | -3.80 (4.35) [1.54]           | -13.29 (8.36) [2.95]            |
| Probe neut. aff.-neut. male                                               | -2.12 (4.39) [1.55] | -4.29 (4.54) [1.60]           | -13.78 (8.72) [3.08]            |
| Utw neut. aff.-neut. male                                                 | -2.16 (5.67) [2.01] | -4.06 (5.94) [2.10]           | -13.90 (9.09) [3.21]            |
| Tw neut. aff.-neut. male                                                  | -2.19 (4.86) [1.72] | -4.10 (5.31) [1.88]           | -14.35 (9.06) [3.20]            |
| Probe aff. neut.-aff. male                                                | -2.93 (3.81) [1.44] | -5.40 (5.00) [1.89]           | -12.40 (9.33) [3.53]            |
| Utw aff. neut.-aff. male                                                  | -4.03 (3.36) [1.27] | -6.14 (4.26) [1.61]           | -12.19 (9.19) [3.47]            |
| Tw aff. neut.-aff. male                                                   | -2.84 (2.30) [0.87] | -6.07 (3.38) [1.28]           | -12.04 (7.81) [2.95]            |
| Probe neut. neut.-aff. male                                               | -3.70 (3.20) [1.21] | -6.43 (3.97) [1.50]           | -12.84 (8.54) [3.23]            |
| Utw neut. neut.-aff. male                                                 | -4.28 (3.31) [1.25] | -7.07 (4.58) [1.73]           | -13.31 (8.16) [3.09]            |
| Tw neut. neut.-aff. male                                                  | -3.91 (3.51) [1.33] | -6.03 (4.10) [1.55]           | -12.46 (8.21) [3.10]            |
| Probe aff. aff.-neut. female                                              | -3.77 (3.41) [1.29] | -6.58 (3.06) [1.16]           | -15.04 (5.77) [2.18]            |
| Utw aff. aff.-neut. female                                                | -3.04 (3.08) [1.16] | -5.92 (2.50) [0.94]           | -15.43 (4.09) [1.54]            |
| Tw aff. aff.-neut. female                                                 | -1.56 (3.75) [1.42] | -4.17 (3.55) [1.34]           | -13.28 (6.14) [2.32]            |
| Probe neut. aff.-neut. fem.                                               | -3.56 (3.27) [1.23] | -6.62 (2.75) [1.04]           | -14.19 (4.75) [1.80]            |
| Utw neut. aff.-neut. female                                               | -3.69 (2.56) [0.97] | -6.38 (2.59) [0.98]           | -13.90 (3.66) [1.38]            |
| Tw neut. aff.-neut. female                                                | -3.22 (3.18) [1.20] | -6.03 (2.70) [1.02]           | -15.81 (4.64) [1.76]            |
| Probe aff. neut.-aff. female                                              | -2.79 (3.02) [1.07] | -4.56 (2.90) [1.02]           | -11.26 (5.39) [1.91]            |
| Utw aff. neut.-aff. female                                                | -3.33 (3.02) [1.07] | -4.70 (3.06) [1.08]           | -10.80 (4.51) [1.60]            |
| Tw aff. neut.-aff. female                                                 | -2.94 (3.13) [1.11] | -5.06 (3.33) [1.18]           | -10.64 (4.98) [1.76]            |
| Probe neut. neut.-aff. fem.                                               | -3.11 (3.32) [1.17] | -4.93 (3.49) [1.24]           | -10.77 (4.92) [1.74]            |
| Utw neut. neut.-aff. female                                               | -2.67 (3.26) [1.15] | -4.66 (3.44) [1.22]           | -10.39 (6.24) [2.21]            |
| Tw neut. neut.-aff. female                                                | -2.54 (3.33) [1.18] | -4.65 (3.15) [1.11]           | -11.34 (5.51) [1.95]            |

*Note.* Scores are presented in mean (standard deviation, SD) [standard error of the mean, SEM].

<sup>1</sup> Amplitudes are averaged over conditions (affective vs. neutral). Probe = Untrustworthy-probe. Utw = Truthful untrustworthy. Tw = Truthful trustworthy. Aff. = affective. Neut. = neutral. For statistical results and additional significant higher-order interactions revealed by post-hoc explorations, see Table S4.

**Table S4.** Additional statistical results for significant interaction effects on N2 amplitudes revealed by post-hoc analyses based on different quantifications.

|                                                           | Mean amplitude <sup>1</sup>                        | Baseline-to-Peak<br>amplitude <sup>2</sup>                                  | Peak-to-Peak<br>amplitude <sup>3</sup>                                     |
|-----------------------------------------------------------|----------------------------------------------------|-----------------------------------------------------------------------------|----------------------------------------------------------------------------|
| Condition × Gender<br>× Task sequence                     | $F_{(1,26)} = 6.04,$<br>$p = .02, \eta_p^2 = 0.19$ |                                                                             |                                                                            |
| Picture type ×<br>Condition × Position<br>× Task sequence |                                                    | $F_{(6,156)} = 3.75,$<br>$p < .01, \eta_p^2 = 0.13,$<br>$\varepsilon = .45$ |                                                                            |
| Picture type ×<br>Condition × Position                    |                                                    |                                                                             | $F_{(6,156)} = 4.46,$<br>$p = .01, \eta_p^2 = .15,$<br>$\varepsilon = .44$ |
| Picture type ×<br>Condition × Position<br>× Task sequence |                                                    |                                                                             | $F_{(6,156)} = 5.60,$<br>$p < .01, \eta_p^2 = .18,$<br>$\varepsilon = .44$ |

*Note.* <sup>1</sup> The remaining main effects, two-way interactions and all higher-order interactions were not significant,  $F_s \leq 2.69, p_s \geq .05, \eta_p^2 \leq .09$ . <sup>2</sup> The remaining main effects, two-way interactions and all higher-order interactions were not significant,  $F_s \leq 4.12, p_s \geq .05, \eta_p^2 \leq .14$ . <sup>3</sup> The remaining main effects, two-way interactions and all higher-order interactions were not significant,  $F_s \leq 3.17, p_s \geq .05, \eta_p^2 \leq .11$ .



**Table S5.** Pearson correlation between self-reported ratings of trustworthiness and picture-wise N2 amplitudes at FCz (N = 30).

|                                         |                    | Self-rating                |                 |                  |                          |               |                |
|-----------------------------------------|--------------------|----------------------------|-----------------|------------------|--------------------------|---------------|----------------|
|                                         |                    | utw-<br>probe<br>affective | tw<br>affective | utw<br>affective | utw-<br>probe<br>neutral | tw<br>neutral | utw<br>neutral |
| Mean N2<br>amplitude                    | Probe<br>affective | $r = -.33^+$               | $r = -.16$      | $r = -.13$       | $r = -.25$               | $r = -.13$    | $r = -.04$     |
|                                         | Tw affective       | $r = -.30$                 | $r = -.11$      | $r = -.11$       | $r = -.20$               | $r = .02$     | $r = .01$      |
|                                         | Utw<br>affective   | $r = -.26$                 | $r = .03$       | $r = -.11$       | $r = -.08$               | $r = .02$     | $r = .04$      |
|                                         | Probe<br>neutral   | $r = -.40^*$               | $r = -.14$      | $r = -.14$       | $r = -.19$               | $r = -.06$    | $r = .02$      |
|                                         | Tw neutral         | $r = -.31^+$               | $r = -.15$      | $r = -.10$       | $r = -.21$               | $r = -.07$    | $r = .06$      |
|                                         | Utw neutral        | $r = -.32^+$               | $r = .04$       | $r = -.08$       | $r = -.08$               | $r = .07$     | $r = .05$      |
| Baseline-<br>to-peak<br>N2<br>amplitude | Probe<br>affective | $r = -.28$                 | $r = -.06$      | $r = -.10$       | $r = -.14$               | $r = -.12$    | $r = .12$      |
|                                         | Tw affective       | $r = -.21$                 | $r = .02$       | $r = -.13$       | $r = -.04$               | $r = .07$     | $r = .12$      |
|                                         | Utw<br>affective   | $r = -.24$                 | $r = .09$       | $r = -.07$       | $r = -.05$               | $r = .05$     | $r = .12$      |
|                                         | Probe<br>neutral   | $r = -.30$                 | $r = -.01$      | $r = -.14$       | $r = -.09$               | $r = -.00$    | $r = .10$      |
|                                         | Tw neutral         | $r = -.25$                 | $r = -.03$      | $r = -.12$       | $r = -.13$               | $r = -.02$    | $r = .12$      |
|                                         | Utw neutral        | $r = -.23$                 | $r = .17$       | $r = -.09$       | $r = .02$                | $r = .10$     | $r = .11$      |
| Peak-to-<br>Peak N2<br>amplitude        | Probe<br>affective | $r = -.03$                 | $r = .10$       | $r = .04$        | $r = .11$                | $r = -.18$    | $r = .41^*$    |
|                                         | Tw affective       | $r = -.05$                 | $r = .18$       | $r = .03$        | $r = .16$                | $r = -.14$    | $r = .41^*$    |
|                                         | Utw<br>affective   | $r = -.08$                 | $r = .19$       | $r = .04$        | $r = .06$                | $r = -.09$    | $r = .32^+$    |
|                                         | Probe<br>neutral   | $r = -.08$                 | $r = .22$       | $r = .00$        | $r = .13$                | $r = -.11$    | $r = .37^*$    |
|                                         | Tw neutral         | $r = -.06$                 | $r = .15$       | $r = -.03$       | $r = .12$                | $r = -.13$    | $r = .35$      |
|                                         | Utw neutral        | $r = -.08$                 | $r = .28$       | $r = .00$        | $r = .13$                | $r = -.12$    | $r = .31$      |

*Note.* <sup>+</sup> The correlation is marginally significant ( $p < .10$ ). <sup>\*</sup> The correlation is significant at an alpha level of .05 (two-tailed). Probe = Untrustworthy-probe. Utw = Truthful untrustworthy. Tw = Truthful trustworthy. Trustworthiness was rated using a Likert scale from 0 = not at all trustworthy to 7 = very strongly trustworthy. The N2 amplitude is measured in microvolt ( $\mu V$ ).

**Table S6.** Percentage of correct responses (%) and mean response times (ms) in correct trials for Picture type, Condition, Task sequence and Gender of the participant.

|                                        | Percentage of correct responses | Response times          |
|----------------------------------------|---------------------------------|-------------------------|
| Picture type <sup>1,2,3</sup>          | *                               | *                       |
| Probe                                  | 96.63 (3.60) [0.66]             | 353.88 (146.39) [26.73] |
| Utw                                    | 97.03 (3.42) [0.62]             | 341.94 (151.84) [27.72] |
| Tw                                     | 98.52 (2.25) [0.41]             | 321.85 (135.75) [24.79] |
| Condition <sup>2,3,4</sup>             |                                 |                         |
| affective                              | 97.96 (2.72) [0.50]             | 329.21 (144.61) [26.40] |
| neutral                                | 96.84 (4.49) [0.82]             | 349.23 (157.52) [28.76] |
| Task sequence <sup>1,3,4</sup>         |                                 |                         |
| Affective-neutral                      | 97.44 (2.51) [0.65]             | 354.07 (168.21) [43.43] |
| Neutral-affective                      | 97.35 (3.05) [0.79]             | 324.37 (114.69) [29.61] |
| Gender of participant <sup>1,2,4</sup> |                                 |                         |
| Male                                   | 96.79 (3.42) [0.88]             | 326.36 (174.66) [45.10] |
| Female                                 | 98.00 (1.78) [0.46]             | 352.08 (105.16) [27.15] |

*Note.* Scores are presented in mean (standard deviation, SD) [standard error of the mean, SEM]. \* Significant at  $\alpha = .05$ . <sup>1</sup> Scores are averaged over conditions (affective vs. neutral). <sup>2</sup> Scores are averaged over task sequence (affective-neutral vs. neutral-affective). <sup>3</sup> Scores are averaged over gender of the participant. <sup>4</sup> Scores are averaged over picture types. Probe = Untrustworthy-probe. Utw = Truthful untrustworthy. Tw = Truthful trustworthy.

**Table S7.** Percentage of correct responses (%) and mean response times (ms) in correct trials for interactions of Picture type, Condition, Task sequence and Gender of the participant.

|                                             | Percentage of correct responses | Response times          |
|---------------------------------------------|---------------------------------|-------------------------|
| Picture type × Condition <sup>1,2</sup>     |                                 |                         |
| Probe aff.                                  | 96.80 (5.11) [0.93]             | 347.70 (163.15) [29.79] |
| Utw aff.                                    | 97.73 (3.39) [0.62]             | 335.34 (156.63) [28.60] |
| Tw aff.                                     | 99.33 (1.42) [0.26]             | 304.60 (126.95) [23.18] |
| Probe neut.                                 | 96.47 (5.63) [1.03]             | 360.06 (161.52) [29.49] |
| Utw neut.                                   | 96.33 (5.29) [0.97]             | 348.55 (165.47) [30.21] |
| Tw neut.                                    | 97.71 (4.02) [0.74]             | 339.10 (160.56) [29.31] |
| Picture type × Task sequence <sup>2,3</sup> |                                 |                         |
|                                             | +                               | *                       |
| Probe aff.-neut.                            | 96.07 (3.71) [0.96]             | 362.93 (177.18) [45.75] |
| Utw aff.-neut.                              | 97.25 (3.31) [0.85]             | 371.27 (175.21) [45.24] |
| Tw aff.-neut.                               | 99.01 (1.18) [0.30]             | 328.01 (155.62) [40.18] |
| Probe neut.-aff.                            | 97.20 (3.51) [0.91]             | 344.83 (113.23) [29.24] |
| Utw neut.-aff.                              | 96.81 (3.63) [0.94]             | 312.61 (123.36) [31.85] |
| Tw neut.-aff.                               | 98.03 (2.93) [0.76]             | 315.68 (117.79) [30.41] |
| Picture type × Gender <sup>1,3</sup>        |                                 |                         |
| Probe male                                  | 96.07 (4.23) [1.09]             | 340.04 (181.79) [46.94] |
| Utw male                                    | 96.02 (4.03) [1.04]             | 331.24 (187.22) [48.34] |
| Tw male                                     | 98.19 (2.62) [0.68]             | 307.81 (159.40) [41.16] |
| Probe female                                | 97.20 (2.86) [0.74]             | 367.72 (104.55) [26.99] |
| Utw female                                  | 98.04 (2.41) [0.62]             | 352.65 (111.63) [28.82] |
| Tw female                                   | 98.75 (1.87) [0.48]             | 335.89 (111.11) [28.69] |
| Condition × Task sequence <sup>2,4</sup>    |                                 |                         |
|                                             | *                               | *                       |
| Aff. aff.-neut.                             | 96.71 (3.34) [0.86]             | 368.54 (168.04) [43.39] |
| Neut. aff.-neut.                            | 98.17 (2.42) [0.62]             | 339.61 (181.37) [46.83] |
| Aff. neut.-aff.                             | 99.20 (0.92) [0.24]             | 289.89 (108.48) [28.01] |
| Neut. neut.-aff.                            | 95.50 (5.66) [1.46]             | 358.86 (135.28) [34.93] |
| Condition × Gender <sup>1,4</sup>           |                                 |                         |
| Aff. male                                   | 97.69 (3.26) [0.84]             | 328.17 (185.79) [47.97] |
| Neut. male                                  | 95.90 (5.72) [1.48]             | 324.55 (176.66) [45.61] |
| Aff. female                                 | 98.22 (2.13) [0.55]             | 330.25 (93.81) [24.22]  |
| Neut. female                                | 97.77 (2.69) [0.69]             | 373.91 (137.41) [35.48] |
| Task sequence × Gender <sup>3,4</sup>       |                                 |                         |
| Aff.-neut. male                             | 97.33 (2.91) [1.03]             | 357.18 (210.02) [74.25] |
| Neut.-aff. male                             | 96.18 (4.07) [1.54]             | 291.14 (130.40) [49.29] |
| Aff.-neut. female                           | 97.57 (2.19) [0.83]             | 350.52 (120.54) [45.56] |
| Neut.-aff. female                           | 98.37 (1.36) [0.48]             | 353.46 (98.28) [34.75]  |

*Note.* Scores are presented in mean (standard deviation, SD) [standard error of the mean, SEM]. \* Significant at  $\alpha = .05$ . + marginally significant at  $\alpha = .10$ . <sup>1</sup> Scores are averaged over task sequence (affective-neutral vs. neutral-affective). <sup>2</sup> Scores are averaged over gender. <sup>3</sup> Scores are averaged over conditions (affective vs. neutral). <sup>4</sup> Scores are averaged over picture types. Probe = Untrustworthy-probe. Utw = Truthful untrustworthy. Tw = Truthful trustworthy. Aff. = affective. Neut. = neutral.

**Table S8A.** Percentage of correct responses (%) and mean response times (ms) in correct trials for higher-order interactions of Picture type, Condition, Task sequence and Gender of the participant.

|                                                       | Percentage of correct responses | Response times          |
|-------------------------------------------------------|---------------------------------|-------------------------|
| Picture type × Condition × Task sequence <sup>1</sup> | *                               |                         |
| Probe aff. aff.-neut.                                 | 94.13 (6.12) [1.58]             | 385.68 (189.68) [48.98] |
| Utw aff. aff.-neut.                                   | 96.53 (4.31) [1.11]             | 389.73 (178.20) [46.01] |
| Tw aff. aff.-neut.                                    | 99.47 (1.41) [0.36]             | 330.21 (147.57) [38.10] |
| Probe neut. aff.-neut.                                | 98.00 (3.55) [0.92]             | 340.18 (191.32) [49.40] |
| Utw neut. aff.-neut.                                  | 97.96 (2.89) [0.75]             | 352.81 (189.79) [49.00] |
| Tw neut. aff.-neut.                                   | 98.56 (2.03) [0.52]             | 325.82 (176.57) [45.59] |
| Probe aff. neut.-aff.                                 | 99.47 (1.19) [0.31]             | 309.72 (126.76) [32.73] |
| Utw aff. neut.-aff.                                   | 98.93 (1.49) [0.38]             | 280.95 (112.81) [29.13] |
| Tw aff. neut.-aff.                                    | 99.20 (1.47) [0.38]             | 278.99 (101.01) [26.08] |
| Probe neut. neut.-aff.                                | 94.93 (6.92) [1.79]             | 379.94 (128.82) [33.26] |
| Utw neut. neut.-aff.                                  | 94.69 (6.63) [1.71]             | 344.28 (143.74) [37.11] |
| Tw neut. neut.-aff.                                   | 96.86 (5.28) [1.36]             | 352.37 (147.80) [38.16] |
| Picture type × Condition × Gender <sup>2</sup>        |                                 |                         |
| Probe aff. male                                       | 96.93 (5.55) [1.43]             | 345.75 (208.46) [53.82] |
| Utw aff. male                                         | 96.93 (4.33) [1.12]             | 332.36 (191.99) [49.57] |
| Tw aff. male                                          | 99.20 (1.47) [0.38]             | 305.39 (162.93) [42.07] |
| Probe neut. male                                      | 95.20 (7.28) [1.88]             | 333.33 (182.54) [47.13] |
| Utw neut. male                                        | 95.10 (6.40) [1.65]             | 330.11 (191.13) [49.35] |
| Tw neut. male                                         | 97.39 (4.36) [1.13]             | 310.23 (167.13) [43.15] |
| Probe aff. female                                     | 96.67 (4.82) [1.25]             | 348.64 (108.09) [27.91] |
| Utw aff. female                                       | 98.53 (1.92) [0.50]             | 338.31 (118.08) [30.49] |
| Tw aff. female                                        | 99.47 (1.41) [0.36]             | 303.81 (82.69) [21.35]  |
| Probe neut. female                                    | 97.73 (3.01) [0.78]             | 386.80 (138.53) [35.77] |
| Utw neut. female                                      | 97.55 (3.72) [0.96]             | 366.98 (139.50) [36.02] |
| Tw neut. female                                       | 98.04 (3.78) [0.98]             | 367.96 (153.89) [39.73] |
| Condition × Task sequence × Gender <sup>3</sup>       |                                 |                         |
| Aff. aff.-neut. male                                  | 96.42 (4.05) [1.43]             | 385.72 (216.45) [76.53] |
| Neut. aff.-neut. male                                 | 98.24 (2.23) [0.81]             | 328.65 (213.89) [75.62] |
| Aff. neut.-aff. male                                  | 99.14 (1.00) [0.38]             | 262.40 (128.15) [48.44] |
| Neut. neut.-aff. male                                 | 93.21 (7.37) [2.79]             | 319.87 (139.28) [52.64] |
| Aff. aff.-neut. female                                | 97.05 (2.58) [0.97]             | 348.90 (101.92) [38.52] |
| Neut. aff.-neut. female                               | 98.09 (2.74) [1.04]             | 352.13 (151.80) [57.37] |
| Aff. neut.-aff. female                                | 99.25 (0.90) [0.32]             | 313.94 (89.69) [31.71]  |
| Neut. neut.-aff. female                               | 97.49 (2.79) [0.99]             | 392.98 (130.86) [46.27] |

*Note.* Scores are presented in mean (standard deviation, SD) [standard error of the mean, SEM]. \* Significant at  $\alpha = .05$ . <sup>1</sup> Scores are averaged over gender. <sup>2</sup> Scores are averaged over task sequence (affective-neutral vs. neutral-affective). <sup>3</sup> Scores are averaged over picture types. Probe = Untrustworthy-probe. Utw = Truthful untrustworthy. Tw = Truthful trustworthy. Aff. = affective. Neut. = neutral. For statistical results and additional significant higher-order interactions revealed by post-hoc explorations for behavioral data, see Table S12.

**Table S8B.** Percentage of correct responses (%) and mean response times (ms) in correct trials for higher-order interactions of Picture type, Condition, Task sequence and Gender of the participant.

|                                                    | Percentage of correct responses | Response times          |
|----------------------------------------------------|---------------------------------|-------------------------|
| Picture type × Task sequence × Gender <sup>1</sup> |                                 |                         |
| Probe. aff.-neut. male                             | 96.12 (4.05) [1.43]             | 365.30 (222.16) [78.55] |
| Utw. aff.-neut. male                               | 96.60 (3.95) [1.40]             | 373.75 (217.77) [76.99] |
| Tw aff.-neut. male                                 | 99.26 (1.15) [0.41]             | 332.50 (192.31) [67.99] |
| Probe neut.-aff. male                              | 96.00 (4.76) [1.80]             | 311.17 (133.07) [50.30] |
| Utw. neut.-aff. male                               | 95.35 (4.32) [1.63]             | 282.65 (145.94) [55.16] |
| Tw neut.-aff. male                                 | 97.19 (3.43) [1.30]             | 279.59 (119.99) [45.35] |
| Probe aff.-neut. female                            | 96.00 (3.61) [1.36]             | 360.22 (125.10) [47.28] |
| Utw. aff.-neut. female                             | 97.98 (2.48) [0.94]             | 368.44 (127.61) [48.23] |
| Tw. aff.-neut. female                              | 98.73 (1.23) [0.47]             | 322.89 (115.36) [43.60] |
| Probe neut.-aff. female                            | 98.25 (1.58) [0.56]             | 374.29 (91.33) [32.29]  |
| Utw neut.-aff. female                              | 98.10 (2.52) [0.89]             | 338.83 (102.45) [36.22] |
| Tw neut.-aff. female                               | 98.77 (2.39) [0.85]             | 347.26 (113.87) [40.26] |
| Picture type × Condition × Task sequence × Gender  |                                 |                         |
| Probe aff. aff.-neut. male                         | 94.50 (6.82) [2.41]             | 407.24 (249.20) [88.11] |
| Utw aff. aff.-neut. male                           | 95.25 (5.34) [1.89]             | 400.62 (211.75) [74.87] |
| Tw aff. aff.-neut. male                            | 99.50 (1.41) [0.50]             | 349.30 (194.51) [68.77] |
| Probe neut. aff.-neut. male                        | 97.75 (4.06) [1.44]             | 323.37 (223.66) [79.07] |
| Utw neut. aff.-neut. male                          | 97.96 (2.89) [1.02]             | 346.88 (226.19) [79.97] |
| Tw neut. aff.-neut. male                           | 99.02 (1.48) [0.52]             | 315.70 (199.93) [70.68] |
| Probe aff. neut.-aff. male                         | 99.71 (0.76) [0.29]             | 277.63 (135.99) [51.40] |
| Utw aff. neut.-aff. male                           | 98.86 (1.57) [0.60]             | 254.35 (142.76) [53.96] |
| Tw aff. neut.-aff. male                            | 98.83 (1.56) [0.60]             | 255.22 (110.88) [41.91] |
| Probe neut. neut.-aff. male                        | 92.29 (9.27) [3.50]             | 344.70 (138.23) [52.25] |
| Utw neut. neut.-aff. male                          | 91.84 (7.90) [2.99]             | 310.95 (157.31) [59.46] |
| Tw neut. neut.-aff. male                           | 95.52 (5.85) [2.21]             | 303.97 (135.84) [51.34] |
| Probe aff. aff.-neut. female                       | 93.71 (5.71) [2.16]             | 361.04 (100.87) [38.13] |
| Utw aff. aff.-neut. female                         | 98.00 (2.31) [0.87]             | 377.28 (146.45) [55.35] |
| Tw aff. aff.-neut. female                          | 99.43 (1.51) [0.57]             | 308.39 (75.03) [28.36]  |
| Probe neut. aff.-neut. female                      | 98.29 (3.15) [1.19]             | 359.39 (161.99) [61.23] |
| Utw neut. aff.-neut. female                        | 97.96 (3.12) [1.18]             | 359.60 (155.75) [58.87] |
| Tw neut. aff.-neut. female                         | 98.04 (2.53) [0.96]             | 337.39 (160.69) [60.73] |
| Probe aff. neut.-aff. female                       | 99.25 (1.49) [0.53]             | 337.80 (119.82) [42.36] |
| Utw aff. neut.-aff. female                         | 99.00 (1.51) [0.54]             | 304.21 (81.58) [28.84]  |
| Tw aff. neut.-aff. female                          | 99.50 (1.41) [0.50]             | 299.80 (93.86) [33.18]  |
| Probe neut. neut.-aff. female                      | 97.25 (3.01) [1.07]             | 410.78 (120.34) [42.55] |
| Utw neut. neut.-aff. female                        | 97.19 (4.36) [1.54]             | 373.44 (134.26) [47.67] |
| Tw neut. neut.-aff. female                         | 98.04 (4.80) [1.70]             | 394.72 (153.23) [54.18] |

*Note.* Scores are presented in mean (standard deviation, SD) [standard error of the mean, SEM]. \* Significant at  $\alpha = .05$ . <sup>1</sup> Scores are averaged over conditions (affective vs. neutral). Probe = Untrustworthy-probe. Utw = Truthful untrustworthy. Tw = Truthful trustworthy. Aff. = affective. Neut. = neutral. For statistical results and additional significant higher-order interactions revealed by post-hoc explorations for behavioral data, see Table S9.

**Table S9.** Additional statistical results for significant interaction effects on behavioral data revealed by post-hoc analyses based on different quantifications.

|                                          | Percentage of correct responses <sup>1</sup>                       | Response times <sup>2</sup>                        |
|------------------------------------------|--------------------------------------------------------------------|----------------------------------------------------|
| Condition × Task sequence                | $F_{(1,26)} = 11.86, p < .01,$<br>$\eta_p^2 = 0.31$                | $F_{(1,26)} = 8.09, p = .01,$<br>$\eta_p^2 = 0.24$ |
| Picture type × Condition × Task sequence | $F_{(2,52)} = 6.01, p < .01,$<br>$\eta_p^2 = 0.19, \epsilon = .87$ |                                                    |

*Note.* <sup>1</sup> The remaining main effects, two-way interactions and all higher-order interactions were not significant,  $F_s \leq 2.61, p_s \geq .12, \eta_p^2 \leq .09$ . <sup>2</sup> The remaining main effects, two-way interactions and all higher-order interactions were not significant,  $F_s \leq 1.53, p_s \geq .23, \eta_p^2 \leq .06$ .
